# Supplementary material
Source: publisher figshare collection journal article supplement (https://acs.figshare.com/ndownloader/files/4170043)
Supplement: Supplementary file 1 [file 4170043]

## **S-1: SUPPORTING INFORMATION**

### **A three-dimensional atlas of iron, copper and zinc in the mouse cerebrum and brainstem.**

*Dominic J. Hare<sup>\*1</sup>, Jason K. Lee<sup>1</sup>, Alison D. Beavis<sup>1</sup>, Amanda van Gramberg<sup>1</sup>, Jessica George<sup>2</sup>, Paul A. Adlard<sup>2</sup>, David I. Finkelstein<sup>2</sup>, Philip A. Doble<sup>1</sup>.*

<sup>1</sup> *Elemental Bio-imaging Facility, University of Technology, Sydney, Broadway, 2050, New South Wales, Australia*

<sup>2</sup> *The Mental Health Research Institute, Royal Parade, University of Melbourne, Australia*

*\* [dominic.hare@uts.edu.au](mailto:dominic.hare@uts.edu.au). PO Box 123, Broadway, NSW, 2050, Australia*

**Supplementary Fig. 1** – Portable document file (.pdf) of 46-plate atlas of iron, copper and zinc in the C57BL/6 mouse cerebrum and brainstem with glossary of brain regions.

**Supplementary Movie 1** – mp4 video of reconstructed three-dimensional models of iron, copper and zinc distribution in C57BL/6 mouse cerebrum and brainstem.

**Supplementary Movie 2** – mp4 video of iron, copper and zinc in substantia nigra reticulata, periaqueductal grey and hippocampus, respectively; with corresponding Allen Mouse Brain Atlas reference.
